# Supplementary material for: A data-driven approach to optimising the encoding for multi-shell diffusion MRI with application to neonatal imaging
Source: PubMed Central journal article supplement (PMC7116416; doi:10.1002/nbm.4348), 2020-07-06
Supplement: EMS88518-supplement-Figure_S1.pdf [file EMS88518-supplement-Figure_S1.pdf]

## Supplementary Material

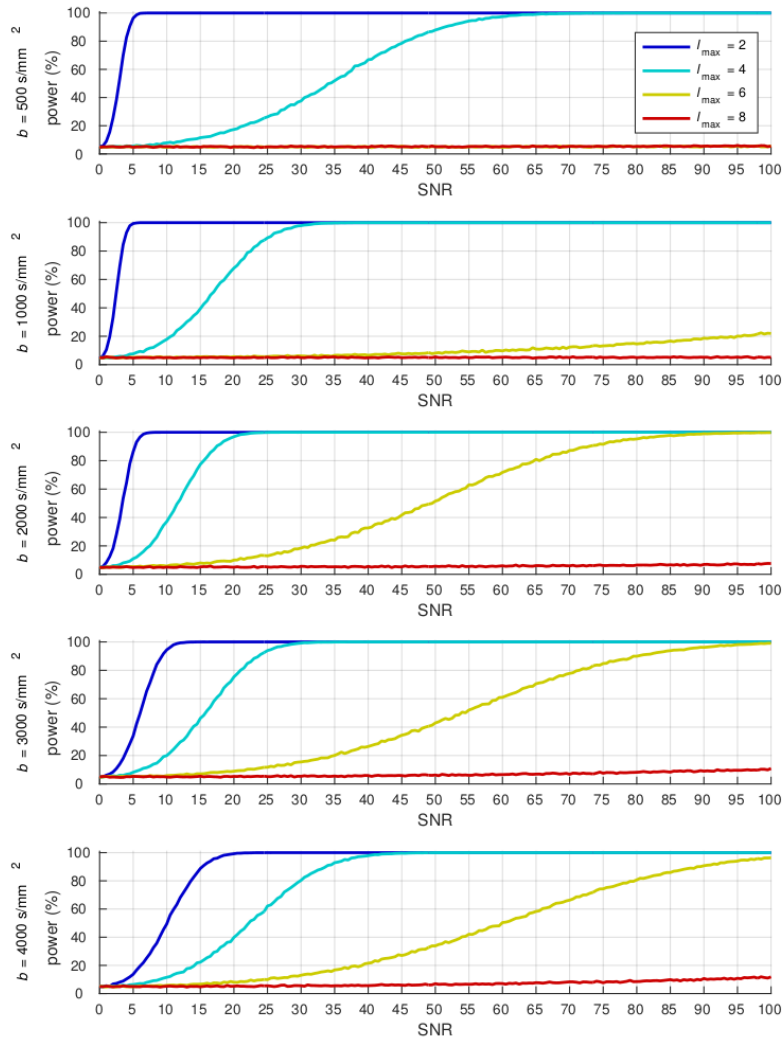

Supplementary Figure 1: The power to detect each axial spherical harmonic (SH) coefficient plotted as a function of the signal-to-noise ratio (SNR) in the  $b=0$  image and assuming a clinically realistic scheme with  $N_{\text{DW}}=100$ , for each  $b$ -value shell independently. Each line corresponds to the power to detect a significant improvement ( $p<0.05$ ) to the fit by including the corresponding  $l_{\max}$  SH terms. This plot was generated using the same procedure as Figure 5 in (Tournier et al., 2013), which corresponds to the adult case.
